# Supplementary material
Source: publisher site journal article supplement (https://www.dovepress.com/article/458428)
Supplement: Supplementary file 1 [file get_supplementary_file.php]

The HRCT images were subjected to a systematic grading protocol, based on a four-tier classification system, tailored for clinical diagnosis: 1. Normal attenuation; 2. Abnormal reticulation; 3. Tractive bronchiectasis; 4. Honeycombing [38]. The UIP patterns were defined by the presence of reticular structures with honeycombing, often supplemented by traction bronchiectasis and predominant peripheral and basal distribution features. Conversely, the absence of typical honeycombing, or the presence of findings such as glass opacity, consolidation, nodules, etc., were indicative of a possible UIP pattern, particularly when patchy and peripheral reticular opacity was seen in a reticular pattern with predominantly peripheral and basal distribution but with localized or without evident honeycombing [39].

Three discrete regions of each lung (upper, middle, and lower) were independently evaluated using the aforementioned four-tier HRCT imaging grading system. The upper lung zone is usually defined as the area of the lung above the level of the tracheal carina. In contrast, the lower lung zone is defined as the area below the level of the inferior pulmonary vein. The middle lung zone is often described as the area of the central lung between the upper and lower regions of the lung. Two radiologists determined each HRCT outcome range by visual estimation of the percentage of parenchymal involvement (to the nearest 5%) in each region. The score for each area was calculated by multiplying the percentage of the fibrotic area by the rank fibrotic scoring scale, as detailed in Table S1, Figures S1 and S2. The six regional total fibrotic scores for each patient's lungs were averaged to produce the final fibrotic score. This resulted in an HRCT fibrotic score ranging from 0 (minimum) to 500 (maximum). These scores were recorded at initial diagnosis and post-anti-fibrotic therapy, offering valuable insights into the therapeutic efficacy and disease progression [39].

**Table S1.** Quantitative HRCT Scoring for Idiopathic Pulmonary Fibrosis

| Score | Characteristic |
| --- | --- |
| 0 | Without fibrosis |
| 1 | Thickening of alveolar septal and interstitium in lung lobules; no dispersed honeycombing |
| 2 | Peripheral honeycomb (with or without septal and interstitial thickening) covering <25% in lung lobules |
| 3 | Peripheral honeycomb (with or without septal and interstitial thickening) covering 25%-49% in lung lobules |
| 4 | Peripheral honeycomb (with or without septal and interstitial thickening) covering 50%-75% in lung lobules |
| 5 | Peripheral honeycomb (with or without septal and interstitial thickening) covering >75% in lung lobules |

**
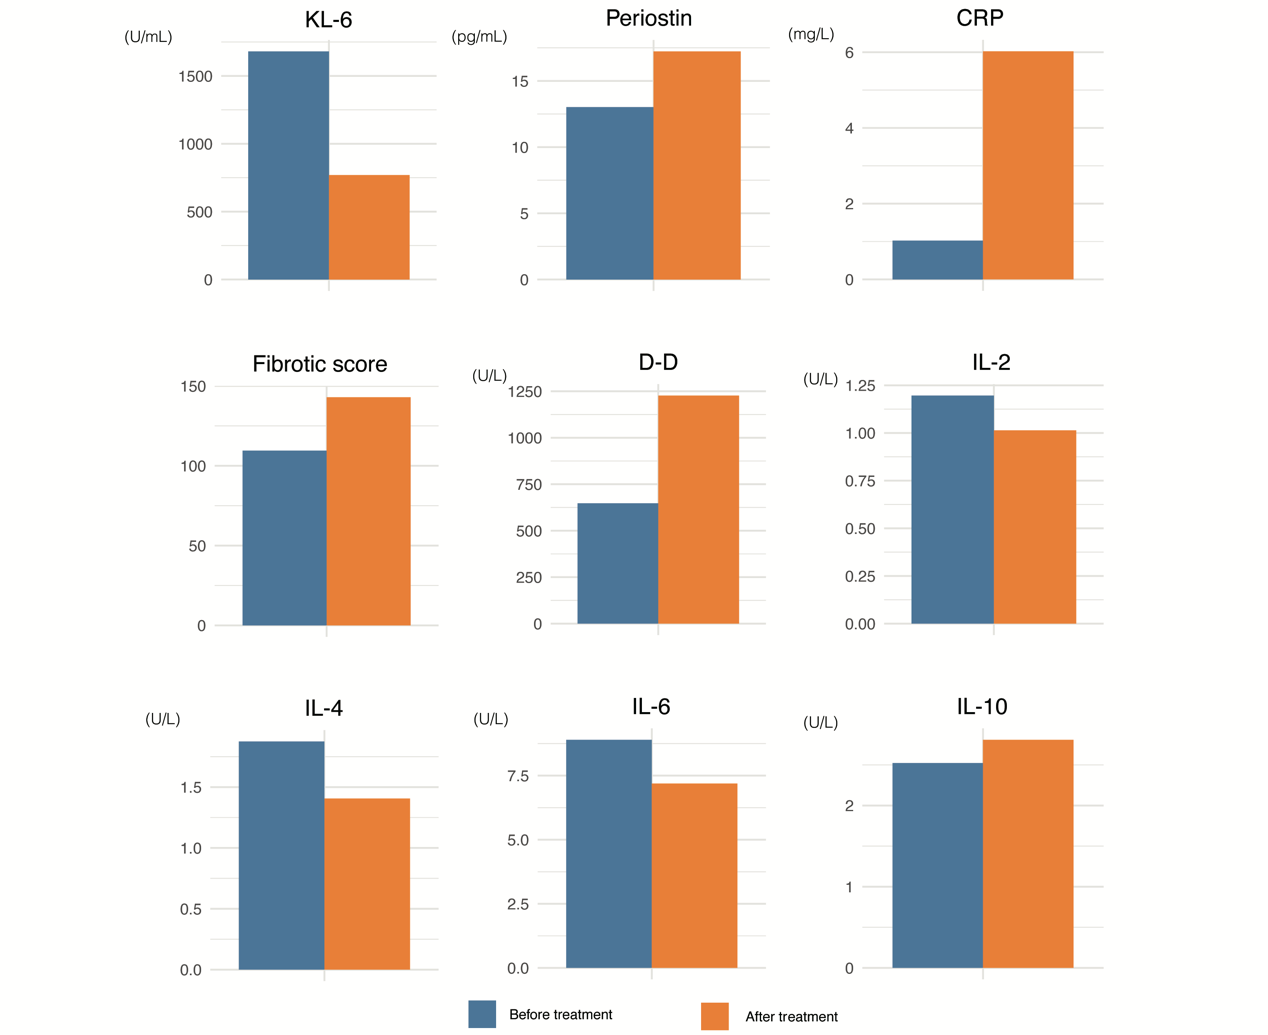
**

**Figure S1.** Illustrated distribution of statistically significant clinical indicators for IPF patients. KL-6, krebs von den lungen-6; CRP, C-reactive protein; D-D, dimer-dimer; IL-2, interleukin-2; IL-4, interleukin-4; IL-6, interleukin-6; IL-10, interleukin-10.


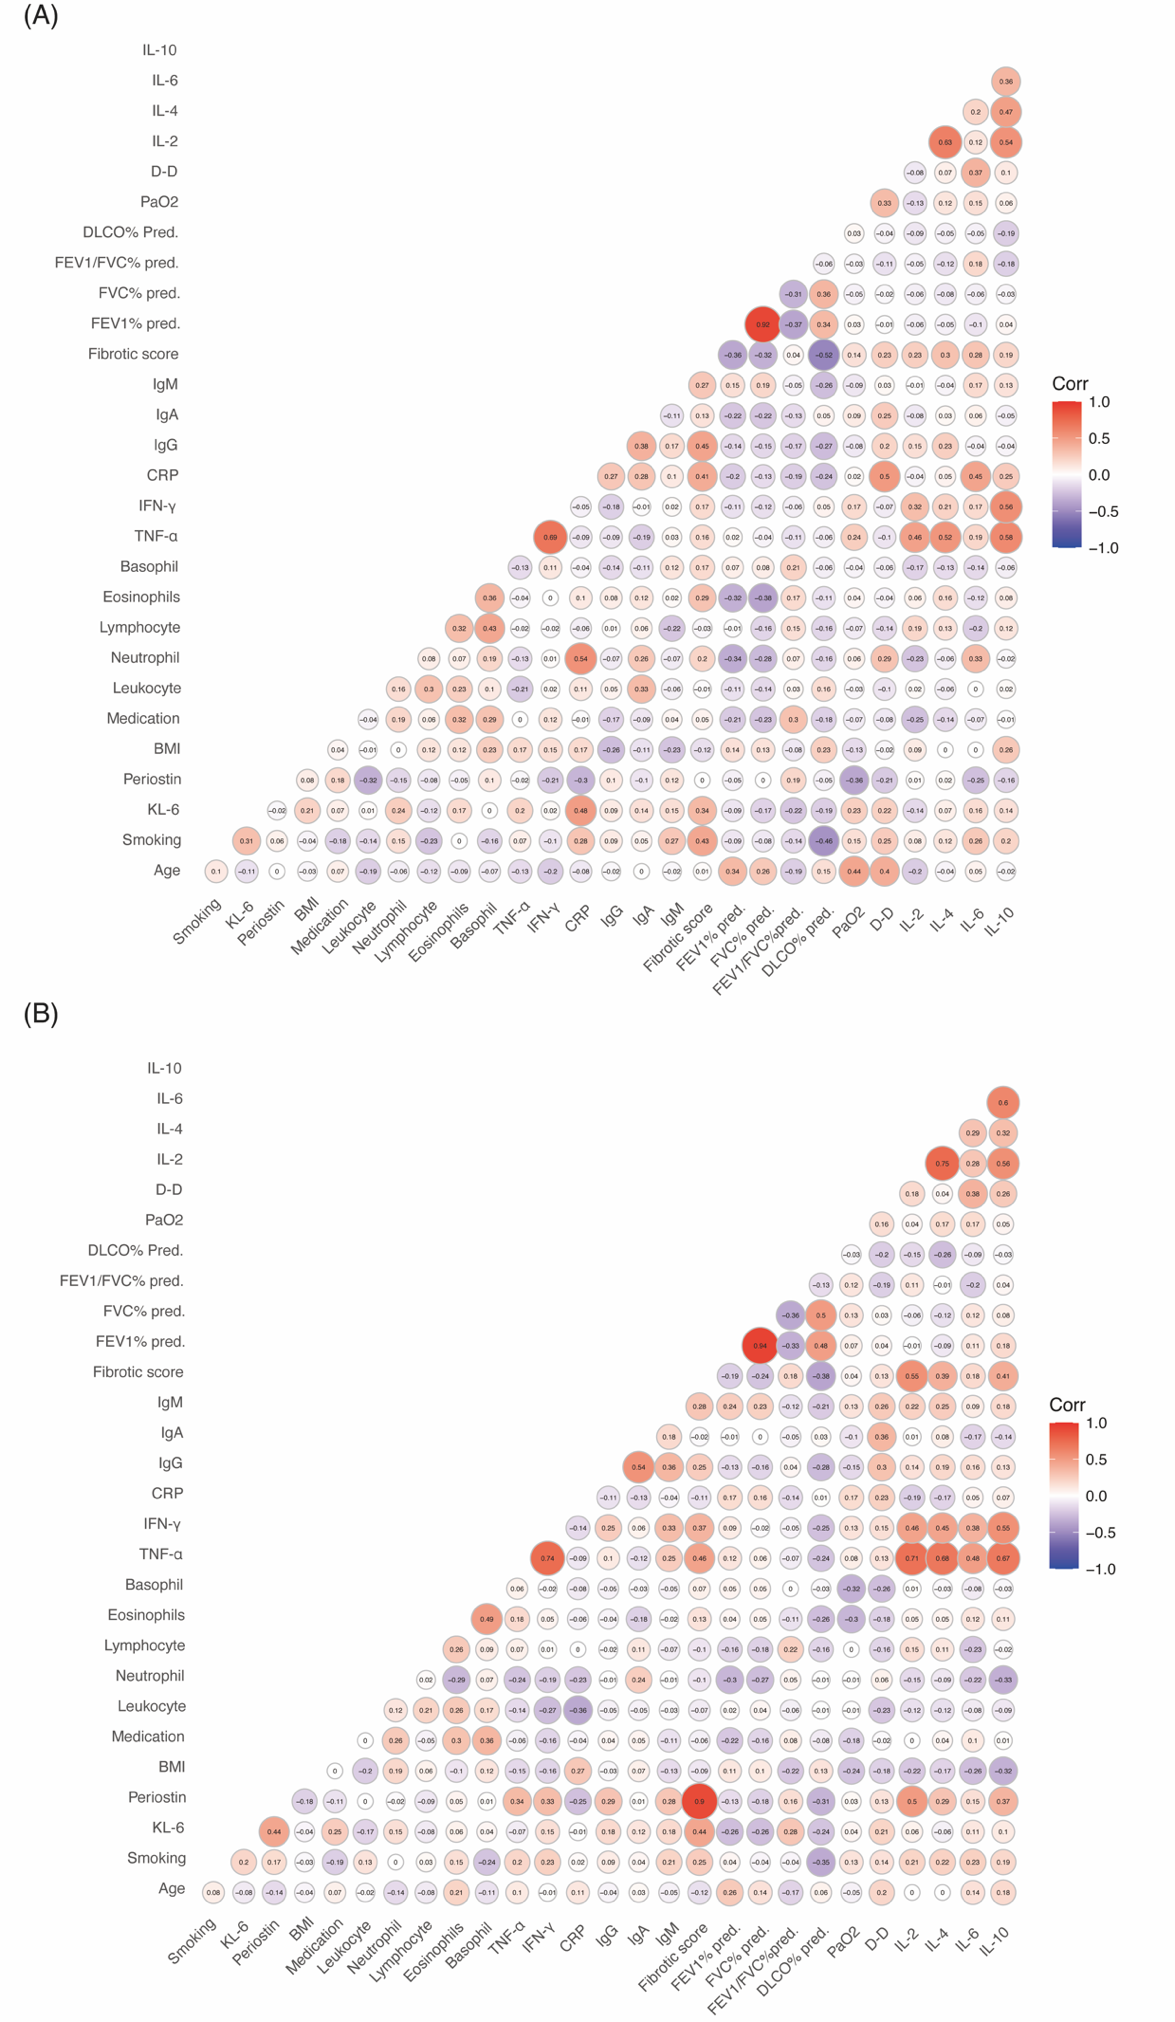


**Figure S2.** Correlation analysis of clinical indicators in IPF patients. **(A), (B)** separately represent before and after anti-fibrotic treatment. BMI, body mass index; KL-6, krebs von den lungen-6; IgG, immunoglobulin G; IgA, immunoglobulin A; IgM, immunoglobulin M; CRP, C-reactive protein; IL-2, interleukin-2; IL-4, interleukin-4; IL-6, interleukin-6; IL-10, interleukin-10; D-D, dimer-dimer; FEV1, forced expiratory volume in 1 s; FVC, forced vital capacity; DLCO, diffuse lung carbon monoxide.

**
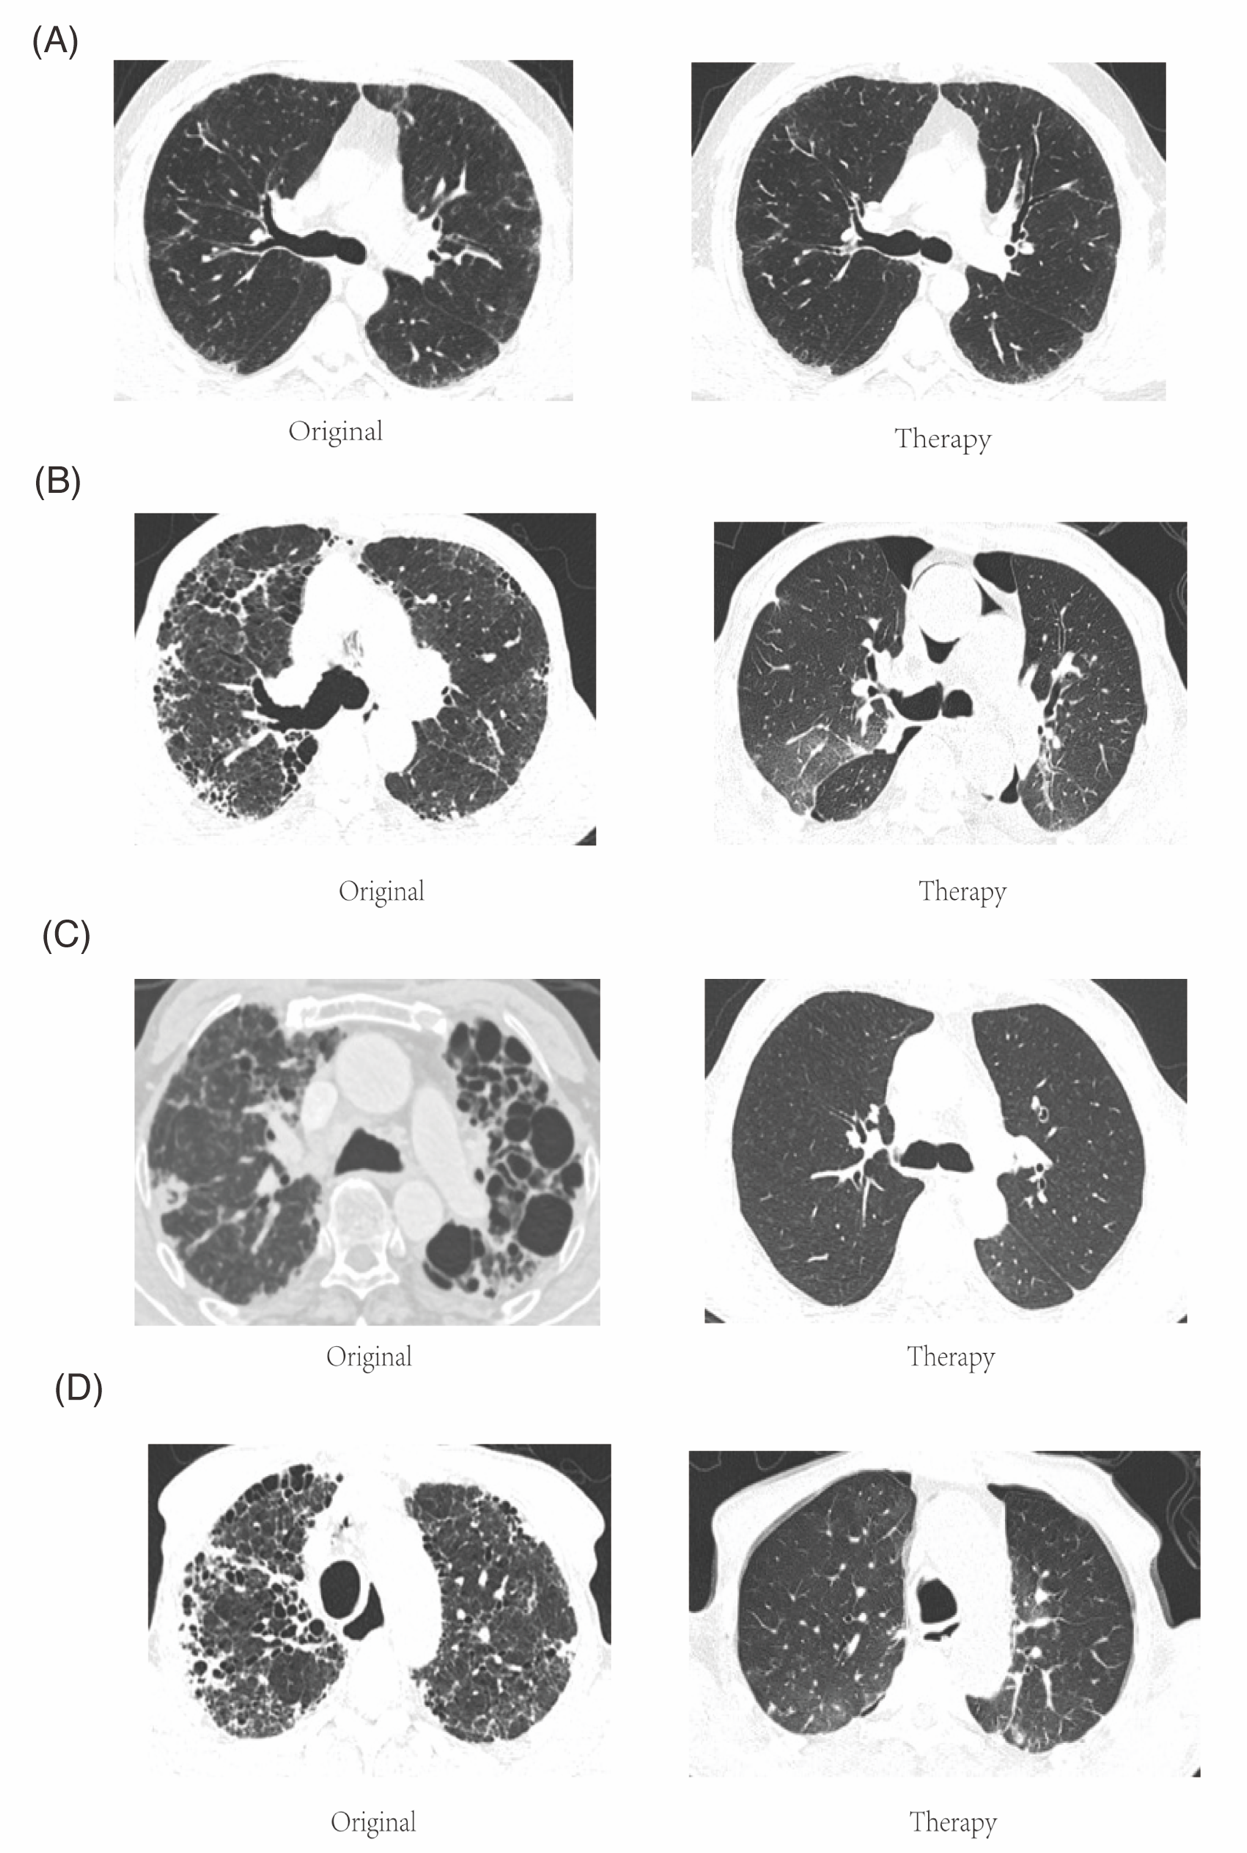
**

**Figure S3.** Radiographic changes at the level of bronchi in improved UIP-IPF patients. (A) A 57-years-old man with IPF shows HRCT fibrosis score of 2 (peripheral honeycombing (with or without septal and interstitial thickening) covering <25% of lung lobules) in the left upper, internal, and lower lobules of lung and is then treated with pirfenidone. (B) A 69-year-old man with IPF shows HRCT fibrosis score of 3 (peripheral honeycombing (with or without septal and interstitial thickening) covering 25%-49% in lung lobules) in right peripheral and left upper, internal, and lower lobules of lung and then treated with nintedanib. (C) A 59-year-old man with IPF shows HRCT fibrosis score of 4 (peripheral honeycombing (with or without septal and interstitial thickening) covering 50%-75% in lung lobules) in most of the left and right upper lobules of lung and was initially treated with nintedanib while eventually treated with a lung transplantation. (D) A 70-year-old man with IPF shows HRCT fibrosis score of 5 (peripheral honeycombing (with or without septal and interstitial thickening) covering >75% of the lobules) in most of the left and right lobules of lung and was subsequently treated with pirfenidone. Original means admission; Therapy means post-therapy.

**
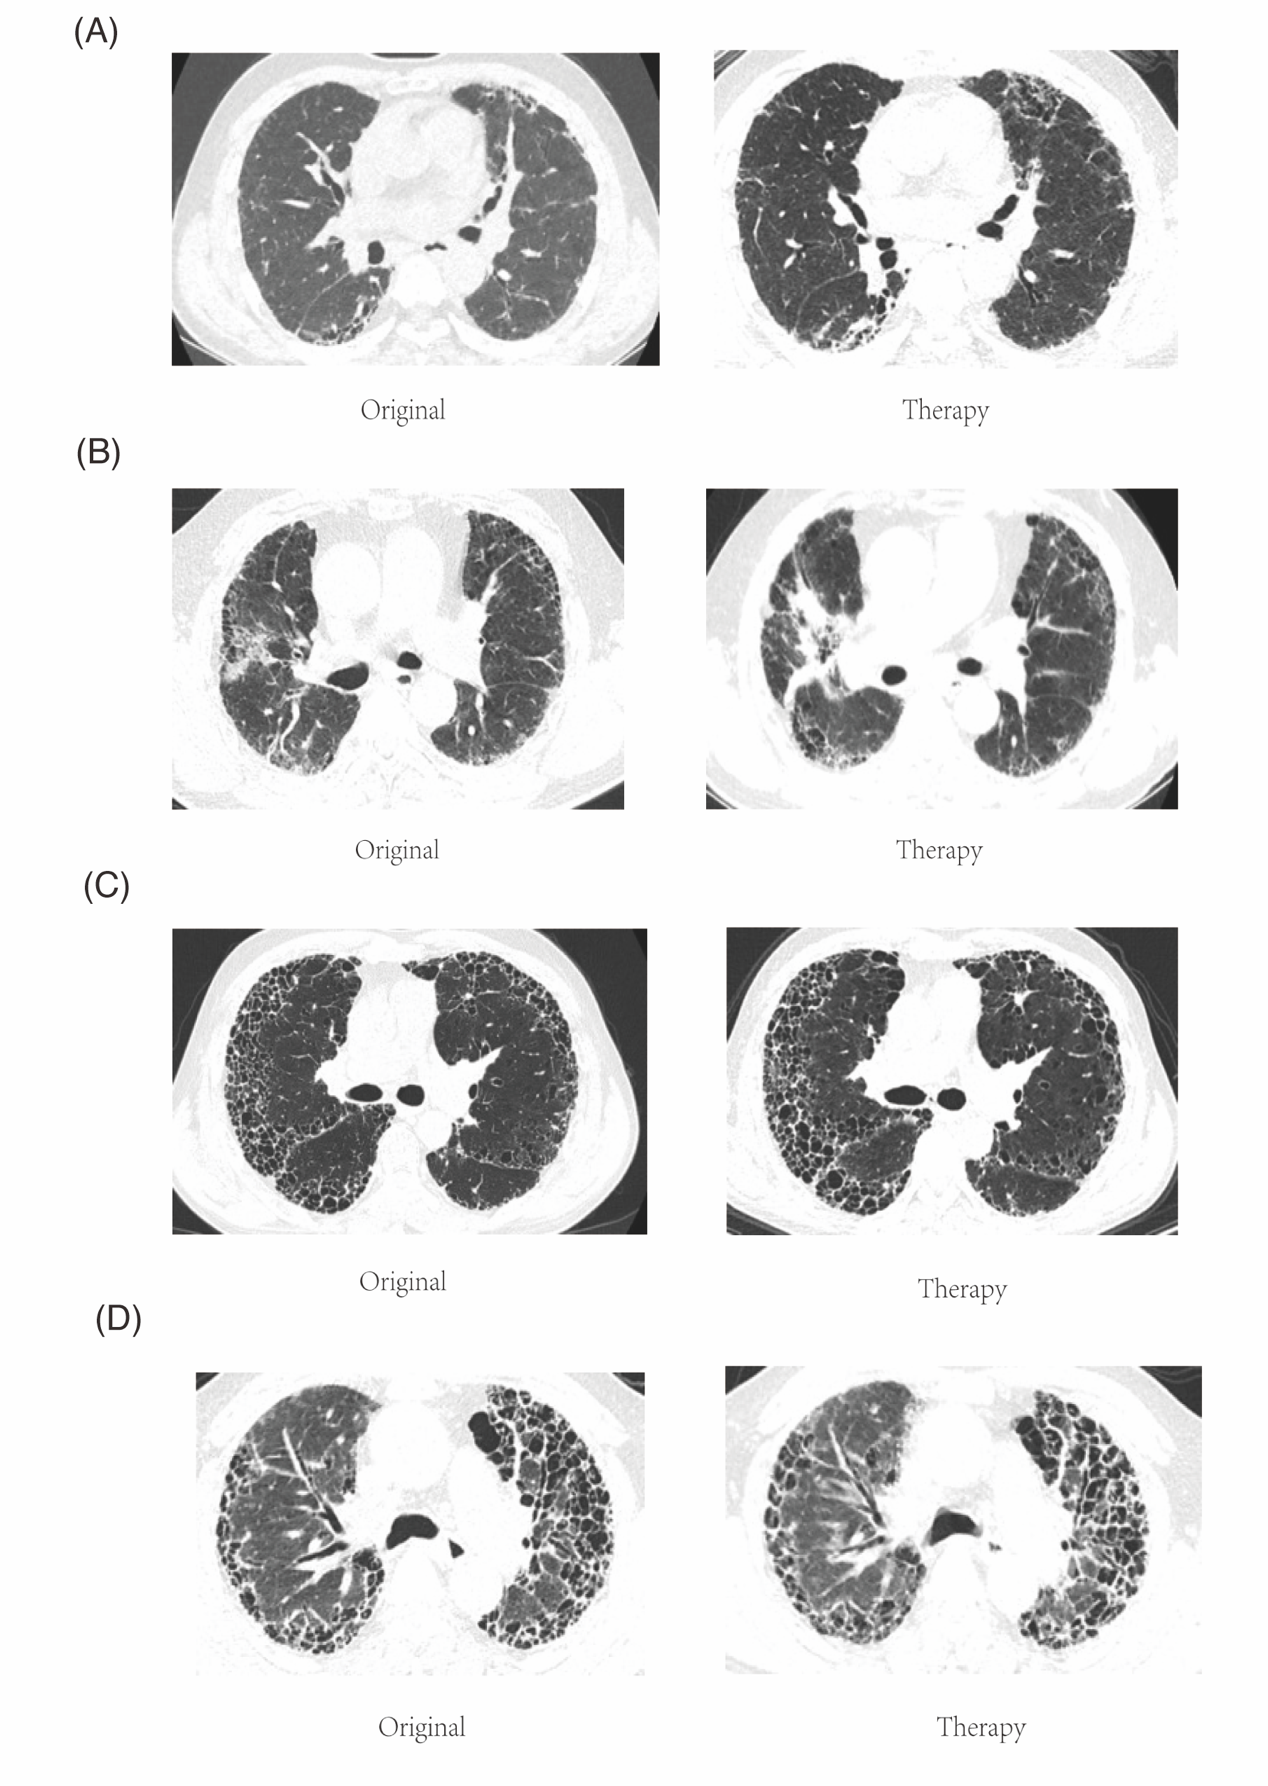
**

**Figure S4.** Radiographic changes at the level of bronchi in worsened UIP-IPF patients.(A) A 69-year-old man with IPF shows HRCT fibrosis score of 2 (peripheral honeycomb (with or without septal and interstitial thickening) covering <25% in lung lobules) in the left upper, right lower lobules of progressive lung thickening which was treated with pirfenidone. (B) A 62-year-old man with IPF shows HRCT fibrosis score of 3 (peripheral honeycomb (with or without septal and interstitial thickening) covering 25%-49% in lung lobules) in left, right lobules of lung peripheral progressive thickening which was treated with pirfenidone. (C) A 59-year-old man with IPF shows HRCT fibrosis score of 4 (peripheral honeycomb (with or without septal and interstitial thickening) covering 50%-75% in lung lobules) in most of the left and right lobules of lung peripheral progressive thickening of the lung was treated with pirfenidone. (D) A 72-year-old man with IPF shows HRCT fibrosis score of 5 (peripheral honeycomb (with or without septal and interstitial thickening) covering >75% in lung lobules) in almost all of the left, and right internal, lower peripheral lobules of lung peripheral progressive thickening which was treated with pirfenidone. Original means admission; Therapy means post-therapy.

**A brief explanation of Pirfenidone and Nintedanib for the readers' convenience**

Pirfenidone and Nintedanib are two medications approved for the treatment of idiopathic pulmonary fibrosis (IPF), a chronic and progressive lung disease characterized by fibrosis of the lung tissue.

Pirfenidone is an anti-fibrotic and anti-inflammatory agent that is thought to work by reducing fibroblast proliferation, inflammation, and the production of fibrosis-associated proteins and cytokines within the lungs. It may help slow the progression of IPF and has been shown to improve lung function in some patients.

Nintedanib is a tyrosine kinase inhibitor that targets multiple pathways potentially involved in the pathogenesis of IPF. It inhibits the growth factor receptors that are implicated in the fibrotic processes, including VEGF, FGF, and PDGF receptors. Similar to Pirfenidone, Nintedanib can slow the progression of the disease and has been demonstrated to reduce the decline in lung function.

Both drugs are significant advancements in the management of IPF, offering options where limited treatments were available. Their use is generally determined by a specialist based on individual patient evaluation, and they are part of a broader management strategy that may include supportive care and oxygen therapy.
